# Supplementary material for: GmBTB/POZ promotes the ubiquitination and degradation of LHP1 to regulate the response of soybean to Phytophthora sojae
Source: PubMed Central journal article supplement (PMC7979691; doi:10.1038/s42003-021-01907-7), 2021-03-19
Supplement: 42003_2021_1907_MOESM2_ESM.pdf [file 42003_2021_1907_MOESM2_ESM.pdf]

**GmBTB/POZ promotes the ubiquitination and degradation of  
LHP1 to regulate the response of soybean to *Phytophthora sojae***

**Chuanzhong Zhang<sup>1,2†</sup>, Qun Cheng<sup>1†</sup>, Huiyu Wang<sup>1†</sup>, Hong Gao<sup>1</sup>, Xin Fang<sup>1</sup>, Xi  
Chen<sup>1</sup>, Ming Zhao<sup>1</sup>, Wanling Wei<sup>1</sup>, Bo Song<sup>1</sup>, Shanshan Liu<sup>1</sup>, Junjiang Wu<sup>3</sup>,  
Shuzhen Zhang<sup>1\*</sup>, Pengfei Xu<sup>1\*</sup>**

<sup>1</sup>Soybean Research Institute, Northeast Agricultural University/Key Laboratory of Soybean  
Biology of Chinese Education Ministry, Harbin 150030, China

<sup>2</sup>Key Laboratory of Soybean Molecular Design Breeding/Northeast Institute of Geography  
and Agroecology, Chinese Academy of Sciences, Harbin 150081, China

<sup>3</sup>Soybean Research Institute of Heilongjiang Academy of Agricultural Sciences/Key  
Laboratory of Soybean Cultivation of Ministry of Agriculture P. R. China, Harbin 150086,  
China

<sup>†</sup>These authors contributed equally.

\*Correspondence authors    xupengfei@neau.edu.cn

zhangshuzhen@neau.edu.cn

**Supplementary Figure 1 Nucleotide and amino acid sequences of GmLHP1. The chromo domain and chromo shadow domain are shown in shadow.**

```

1      AAAGGAAAAAGGGCGAATGGAGAAAACGCTTAAATAAAAAACCGGAGCGATGGATCAC
61     ACTTTTCGGTATAGATGGACAACCTCATCACCTCAGACTCTCGGAGAGAAATGGACACAAC
121    TTTGATTGTGCTTCTCCGCTCTGAAGCTGAAGCTGTTTCTGTTGTGCTAAGAAAAAAA
181    AACAAAAACAAAACAGATATAGGAGAGAAAGAGAAAAAAGAACATAGTTCTTTCA
241    GGGTTGCTCCTTTTCGATTCTGTTGCGTTTTGTTGTTGTTGTTGTTGTTGTTGTTG
301    TGGTCTGCTGCTGCTCAATGAAGGGTGGTGGGAAGAGAAAGGCTTACCTCGGA
1      M K G G G G K R K A S T S E

361    GGCTCCGAACGATGTTGTTGTTGTTGCTGCTTCTGCTCTTCTGATGATGCTGA
15     A P N D V V V V V A A S A P S D D A D

421    TTTGGGTGTGGAGATGTCGGGGTGTGAAAGTTCAAACTTTGAGGAAACGAGGGTAC
35     L G V G D V G G V K V Q N F E G N E G T

481    CCAGTTGCGGAATACTGAAGAACAGGAAGAAGAACCCACCACGTGGAGGTGATGAAG
55     Q L R N T E E Q E E E P H H V E G D E G

541    AGGAGAAGACGAAGAAGATTATGCCGAGGAGAGGAATATGAAGAAGAAAATGGTGG
75     G E D E E D Y A E G E E E Y E E E N G G

601    TGCTGTGCTGGGGACAACAAGTTTCTGCTCTTGGTGAATAATTTCTTTGAAGTTGA
95     A V A G G Q Q G F P A L G E N F F E V E
                               Chromo domain →
661    AGCCATACGTGTAAGAGGTGCGCAAGGGTGAAGTCAATACTTAATCAATGGAATGG
115    A I R R K R L R K G E V Q Y L I K W N G

721    GTGGCCGAGACGCCAACACTTGGGAGCCTTGGAAAATCTAGAGTCTGTTCTGATGT
135    W P E T A N T W E P L E N L E S V P D V

781    TGTGAAGCTTTGAGGAGAGCTTGAAGTCCGAAAACATCGTAAGCCGAAACGCAAGCA
155    V E A F E E S L K S G K H R K R K R K H
                               ← Chromo domain
841    TGTAGTGCATCATACTCAACCAAGAAGCGGTGGAGCGTTCGACAACCTTACAGCCT
175    V V H H T Q P K K R L E R S T T P Y S L

901    TCGGCGTTTTCAACTAGTACAGTGAAGAACATACACAGTCTGCTCCTCTTAAATGA
195    R R F S T S T A E N H T Q S A P P L N D

961    TCCTAGCCTCCAGATATCCCGCCTCCCTCACACTGTGCTGTTTCTGATGATGTTGG
215    P S L P D I P A F P H T V L F S D D V G

1021   AAATGGTGTGAAGCAGCAGTCTAGAAAAGCCACCCAGTAATGCTAACAGGTCTGC
235   N G A E G S S L R K A T P S N A N R S A

1081   AAATGGTTCAGAACAAAATATTAAGGAATGAGGAAAATGATTATGATCCTGTGCTTAG
255   N G S E Q N I K R N E E N D Y D P V L S

1141   TGAGCTTAAAGCTATGACTTCTAATGGGAATGATGCAGACAGGCTTGAATACGGAATCC
275   E L K A M T S N G N D A D R L A I R I P

1201   AGAAGCTAAGGGTCTGGGCCTTCTGGCAGTAATGGTCAAATGGATGCTAAATCAAAGGG
295   E A K G S G P S G S N G Q M D A K S K G

1261   GGCTTGATGGAACAAGTGAAGTGACCGCTGCCGGGATCCAAAAGGAGAAAATGTGG
315   A C M E T S E S D R C R G S K R R R K C G

1321   TTCGTAAGAGGTTCAAGAAAGAACTATATGCTAATGAGCCTGCTAATCGGAAAATCC
335   S V K R F K K E L Y A N E P A N A E N P

1381   AGTTAGCATGCCTGTTGGTACAGCTGAGCCAGAACAAGAGATGCTGTTAGTGGTGG
355   V S M P V G T A E P E R T R D A G S G G
                               Chromo shadow domain →
1441   CAATACTAATCATGCCAGCCTGCTAGCAATATTGTAACATTGTAAGCCAGTAGGCTA
375   N T N H A R P A S N I V N I V K P V G Y

1501   TTCAGCTTCAGTAGCCAGTGAATGCAGGATGTTTGTAGTAACTTTGCGCTTCAAAGTC
395   S A S V A S G M Q D V L V T F V A S K S

1561   TGATGGAACAGAAGTGTGGTTGACAACAAGTATCTAAAAGCATTTAATCCACTTCTCT
415   D G T E V M V D N K Y L K A F N P L L I

1621   GATCAATTTCTATGAGCAGCATCTTCCGTACAGCCCTACATTGTGACCAACAGAGAATA
435   I N F Y E Q H L R Y S P T L *
                               ← Chromo shadow domain
1681   GAAGGTGCTTTTGAGTTGTAGTTAGTTTACACGATTGTGCTTAGTTAGTAGTTTGTGTT
1741   GAAGAATGCTTACTTTTATAGATGCAGAAGATAGTAAAGGTAAGAAATGCATTGTTG
1801   TTAGTTACACCTAGGTATGATTTAACAAGTGGTTGTCAGTGGCTATATACTGACTGA
1861   TGCATGCTGATGGCATAAATACTATATTTGAATGCTCAACACACAGGAGATAGACA
1921   ATAGTTCTTAGGAGTTAGTCAAGAATGAAAACTATTTGGATTAATGTAATTTTAT
1981   GGAAGTCTTGGCTATTCTGAGCAGATTGTTGCTATTATAATTTGAATACTGATTGG
2041   TTGATTGATTGACATGATTCTAAAGGAAAATCCACAATTAACGTGTTAA

```

**Supplementary Figure 2 Detection of transgenic soybean lines in this study. (a)** Immunoblots showing the expression of GmBTB/POZ-Myc fusion protein in three independent T4 *GmBTB/POZ-OE* soybean plants and the WT controls. The total protein extracts were analyzed in a 12% SDS-PAGE gel for the immunoblot probed with anti-Myc antibody. **(b)** Relative *GmBTB/POZ* expression levels in T4 *GmBTB/POZ-OE* soybean plants. **(c)** The three independent T4 *GmBTB/POZ-RNAi* and WT soybean plants were tested using Quickstix Kit for Liberty Link bar strips. **(d)** Relative *GmBTB/POZ* expression levels in T4 *GmBTB/POZ-RNAi* soybean plants. **(e)** Immunoblots showing the expression of GmLHP1-Flag fusion protein in three independent T4 *GmLHP1OE* soybean plants and the WT controls. The total protein extracts were analyzed in a 12% SDS-PAGE gel for the immunoblot probed with anti-Flag antibody. **(f)** Relative *GmLHP1* expression levels in T4 *GmLHP1OE* soybean plants. **(g)** Southern blot analysis of T4 *GmLHP1RNAi* and WT soybean plants. Twenty micrograms of genomic DNA digested by the restriction enzyme Hind III was hybridized with the probe derived from the bar-specific fragment (354 bp). **(h)** Relative *GmLHP1* expression levels in T4 *GmLHP1RNAi* soybean plants. **(i)** Immunoblots showing the expression of (domain+C)-Myc fusion protein in three independent (*domain+C*)-*OE* soybean hairy roots and the EV controls. The total protein extracts were analyzed in a 12% SDS-PAGE gel and probed with an anti-Myc antibody for the immunoblot. **(j)** Immunoblots showing the expression of (N+domain)-Myc fusion protein in three independent (*N+domain*)-*OE* soybean hairy roots and the EV controls. The total protein extracts were analyzed in a 12% SDS-PAGE gel and probed with an anti-Myc antibody for the immunoblot. **(k)** Immunoblots showing the expression of GmWRKY40-Flag fusion protein in three independent *GmWRKY40-OE* soybean hairy roots. The total protein extracts were analyzed in a 12% SDS-PAGE gel and probed with an anti-Flag antibody for the immunoblot. **(l)** The *GmWRKY40-RNAi* transgenic soybean hairy roots were tested using Quickstix Kit for Liberty Link bar strips. **(m)** Immunoblots showing the expression of GmLHP1-8-Flag fusion protein in three independent *GmLHP1-8-OE* soybean hairy roots and the EV controls. The total protein extracts were analyzed in a 12% SDS-PAGE gel and probed with an anti-Flag antibody for the immunoblot.

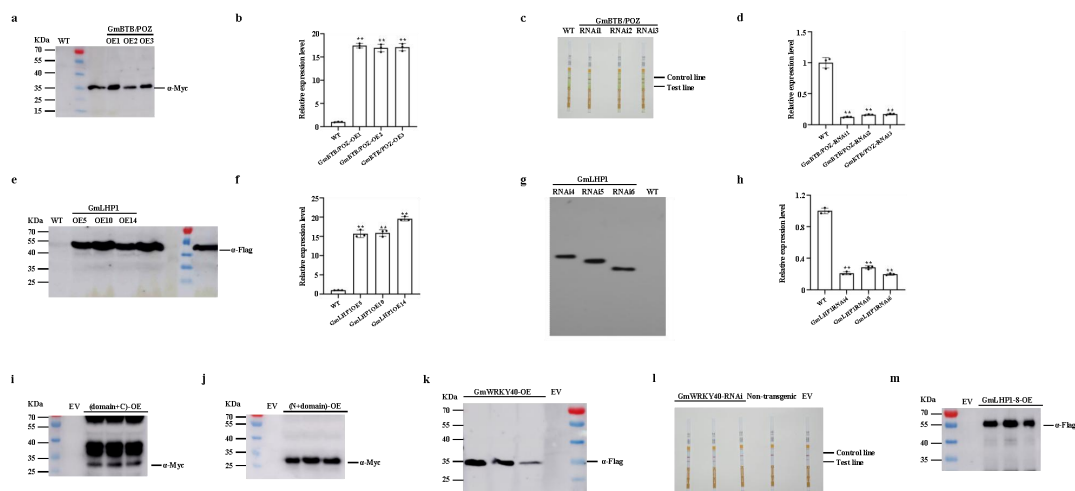

**Supplementary Figure 3 The active region of GmBTB/POZ involved in interaction and ubiquitination of GmLHP1.** (a) Scheme of GmBTB/POZ different regions inserted into yeast vectors pGBD. (b) GmLHP1 interacts with GmBTB/POZ different regions in yeast cells. The yeast cells were selected on SD medium lacking Leu and Trp (DDO), and interaction was assessed based on their ability to grow on selective SD medium lacking Leu, Trp, His, and Ade (QDO) or SD medium lacking Leu, Trp, His, and Ade (QDO) but containing X- $\alpha$ -Gal for 3 days at 30°C. (c) BiFC analysis of the interaction of GmLHP1 with GmBTB/POZ different regions. The bright-field, YFP fluorescence (yellow), chlorophyll autofluorescence (red), and combined images were visualized under a confocal microscope at 16 h after transfection. Scale bars indicate 10  $\mu$ m. (d) *In vitro* cell-free degradation assays of GmLHP1-His in protein extracts from (*domain+C*)-OE and (*N+domain*)-OE transgenic soybean hairy roots. (e) Scheme of GmBTB/POZ (*domain+C*) and (*N+domain*) regions inserted into yeast vectors pGBD. (f) GmLHP1 interacts with the (*domain+C*) and (*N+domain*) regions of GmBTB/POZ in yeast cells. (g) BiFC analysis of the interaction of GmLHP1 with GmBTB/POZ (*domain+C*) and (*N+domain*) regions. (h) The (*domain+C*) and (*N+domain*) of GmBTB/POZ promotes the ubiquitination of GmLHP1 *in vivo*. GmLHP1-Flag was immunoprecipitated using anti-Flag-Tag Mouse mAb (Agarose Conjugated) from *GmLHP1-OE*, *GmLHP1-OE/(domain+C)-OE* and *GmLHP1-OE/(N+domain)-OE* transgenic soybean hairy roots by high-efficiency *A. rhizogenes*-mediated transformation. The transgenic hairy roots were treated with 100  $\mu$ M MG132 for 8 h before extraction. The immunoprecipitated protein was examined using anti-Flag and anti-ubi antibodies.

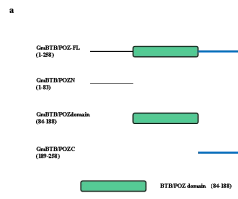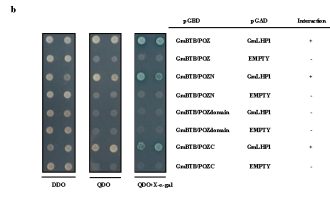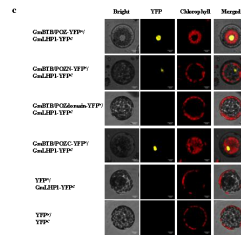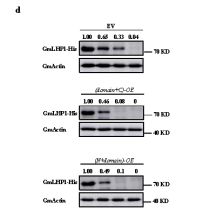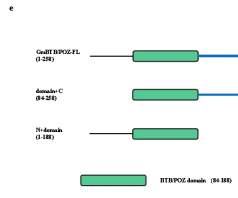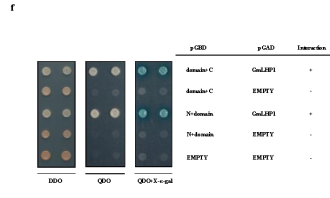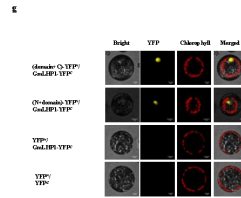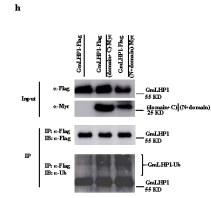

**Supplementary Figure 4 Subcellular localization and transcriptional activation analysis of GmLHP1. (a) Subcellular localization analysis of GmLHP1. (b) Transcriptional activation analysis of GmLHP1.**

**a**

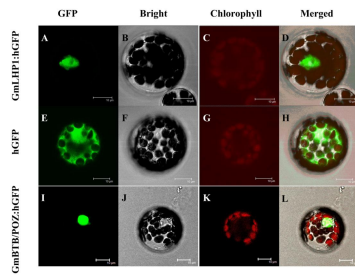

**b**

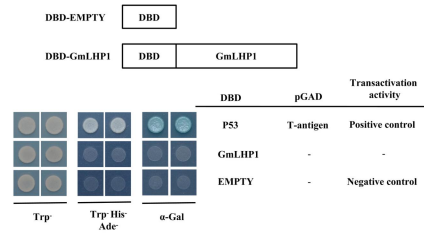



**Supplementary Figure 6** Expression kinetics of *GmBTB/POZ*, *GmLHP1*, *GmWRKY40*, and *GmPRI* in response to *P. sojae* infection in resistant soybean cultivar ‘Suinong 10’. The relative expression levels are expressed as fold changes relative to the transcript level of each gene at the 0 h time point. Fourteen-day-old soybean plants were used for analysis. The housekeeping gene *GmEF1* was used as an internal control to normalize the data.

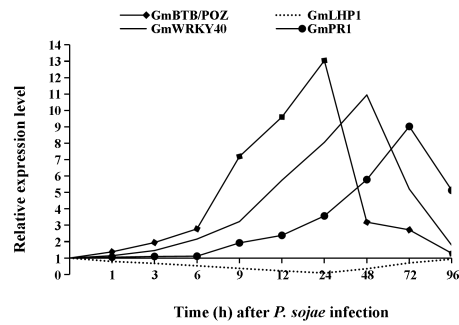



**Supplementary Figure 7 Nucleotide and amino acid sequences of GmWRKY40.**  
The WRKY domain is shown in shadow.

```

1      AAACAAGTAGCGGATATATTCGCATGTGTCTTTTTCTCACTCTCTTTCTCTCAGTT
61     TCCTTCTCAACTGTGCTCCTTCTAAGTGCTACTCCCTCCCTATATATATATGCTTCTC
1      M L L

121    TCACCTCACAACTTAATTTGAACCTCTCACCTTGCTCATCATCTGGAATTTATTTGGCA
4      S L H K L N L N L S P C S S S G I Y L A

181    GTCATGGATTATTCATCATGGATTAACACTTCCTTGGATCTCAACATTAATCCATAGG
24     V M D Y S S W I N T S L D L N I N L H R

241    GTTCAOGAAGAACTCCCAAAAAGCAGGTGAAAAACAATTTTTCTCATTGGATTGGAG
44     V H E E L P K K Q V E N N F F S L D L E

301    GTGAAGAAATCTTCTGTAAAAAAGAGTCAGCAGGTGCCTTGGCGGAGAACTGAAGCGG
64     V K K S S V K Q E S A G A L A E E L K R

361    GTGAGTGCAGAAAACAAGAAGTTAACCGAAATGCTCACAGAGATGTGTGAGAACTACAAC
84     V S A E N K K L T E M L T E M C E N Y N

421    ACTTTGCGAAGCAATTTGATGGAATACATGAGGAAGAATCCTGATAAGGAGCTCAGCTCA
104    T L R S N L M E Y M R K N P D K E L S S

481    TCAAGAAAAGGAAGTCTGCAAGCAGCAACAACAATAGTACTATTCCAATGGGAGTCAAC
124    S R K R K S A S S N N N S T I P M G V N

541    GGAACCTCTGAAGCAGCTCAACCGATGAGGAATCCTGCAAGAATCCAAGGAAGACATG
144    G T S E S S S T D E E S C K N P K E D M

601    AAGACAAAATTTCAAGAGTTTATATGAGGACAGAAGCATGTGATACAAGCCTTATTGTG
164    K T K I S R V Y M R T E A S D T S L I V
                                WRKY domain→
661    AAAGATGGATATCAATGGAGAAATATGGACAAAAGGTGACCAGAGATAACCTTCTCCA
184    K D G Y Q W R K Y G Q K V T R D N P S P

721    AGAGCATATTTCAAGTCTCTTTGCTCCAAGCTGCCCGGTCAAAAAGGAGTCAAAAGA
204    R A Y F K C S F A P S C P V K K K V Q R

781    AGTGTGGATGATCAATCTGTTCTGGTTGCAACTTATGAAGGAGAGCACAAATACACAC
224    S V D D Q S V L V A T Y E G E H N H T H

841    CCTTCTCAAATGGAGGTAACAACAGGTCCAACCGTTCAGTATCATGTTACAGCTCTCTT
244    P S Q M E V T T G S N R S V S C S A S L
←WRKY domain
901    AGCTTCTCCGACCAACAGTTACCTTGAAGTGGACAAAATCCAAGTCCAGCAGTGAAGTCT
264    S S S A P T V T L D W T K S K S S S E S

961    AAGAATGTAATCCAAAACGAATCACCAGAAGTCCCGCAGGTTTGGTAGAACAGATG
284    K N V N P K T E S P E V P Q V L V E Q M

1021   GCTACTCCTTGACCAAGGATCCTAATTTAGAGCAGCACTAGTTGCCGCCATCTCTGGA
304    A T S L T K D P N F R A A L V A A I S G

1081   AAAATGTTGCACAATAATAAATAGTAGAAAATGAGTCAACTGTATTTAACTCATTGTTA
324    K M L H N N N *

1141   AGCAGTATTCTATAAGTGGATCTTGTTAGAGCACATGATCTCTTTGTAATAACAACATA
1201   GGACATTGCTACGTATGTAGAGCTCCTCAATTTAATCAATCCTTTTGGTGGAAATAGAGC
1261   TCCACTCAGGATCGATAGCATGTCTAGCTGATTTGTCATTTGCTAATCATGCTCATCTCA
1321   GTCTTCTATCTTCTGCATCTGGATGATTAATAAGTTAGTTTACAATTAAGTTCTGGCG
1381   AAGTTTCTATAGCATACAAAAGCAAAGAAAACCTTTGTTTCGAAAAGTCAACTCTATTG
1441   AGTATTGAGTATTGACAATAACAATATCTCTTGTGATTTTCCAAGTGCATTTGGAACA
1501   CCGCTTCCCTTTTATCTCACAAAAGATTATAATAGGGATGCAACGATCGGAACTTC
1561   TCAGGCTGTTAATACATTATATAGATTAGACTCCTAGTCTGAGATTTTCACTTCAC

```

**Supplementary Figure 8 The early-flowering phenotype of *GmLHP1RNAi* soybean plants (43-d-old plants) under artificial long-day conditions.**

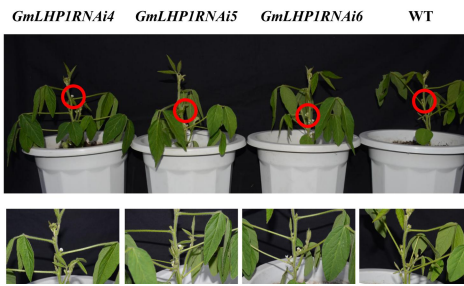

# Supplementary Figure 9

Figure 2a

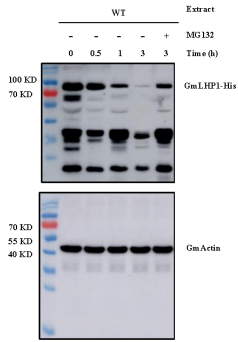

Figure 2c

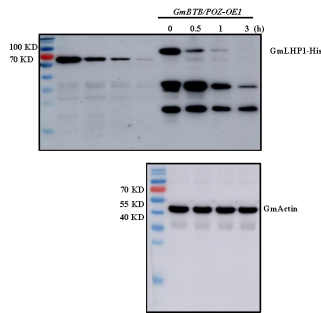

Figure 2d

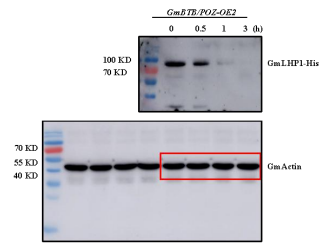

Figure 2e

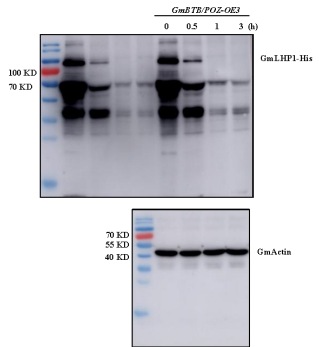

Figure 2f

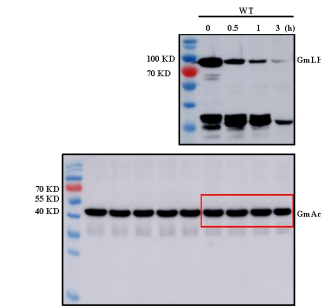

Figure 2g

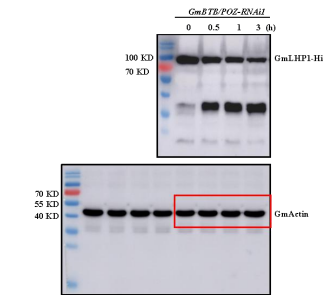

Figure 2h

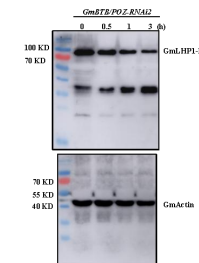

Figure 2i

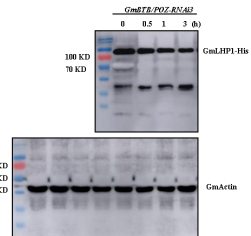

Figure 2k

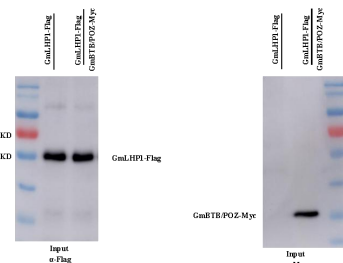

Figure 2k

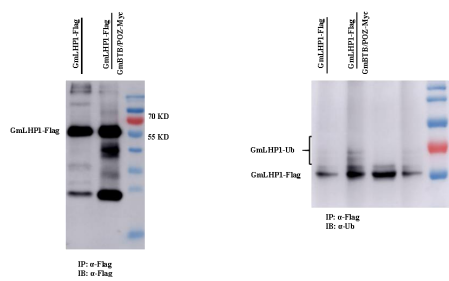

Figure 7g

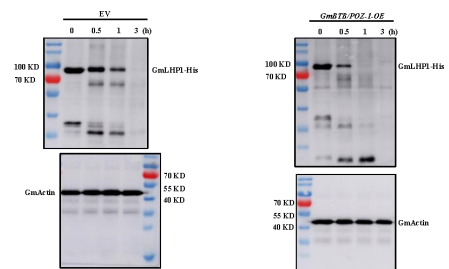

Figure 7h

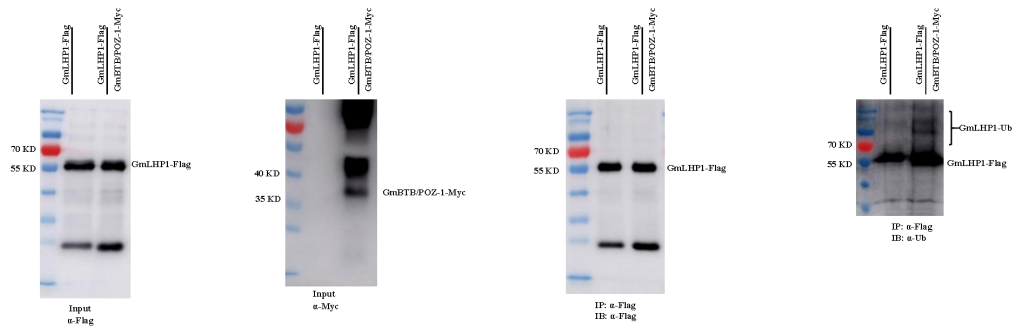

**Supplemental Table 1. List of primers used in this study.****Primers for quantitative real-time PCR**

| <b>Primer name</b>      | <b>Primers (5'-3')</b>                                   |
|-------------------------|----------------------------------------------------------|
| <i>GmLHP1-qPCR</i>      | F: AAGGTTTTCTGCTCTTGGTGA<br>R: CCGCTTCTTGGGTTGAGTATG     |
| <i>GmPRI-qPCR</i>       | F: TGAAAATGTGGGTTGATGAGAAAT<br>R: AAGTGATGAAAGTGCCTCCGTT |
| <i>GmMEKK2-qPCR</i>     | F: CGGGAATACACGAGGGACAT<br>R: GCACATCCCAAAGCCCAT         |
| <i>GmWRKY40-qPCR</i>    | F: GAGGAACTGAAGCGGGTGA<br>R: AGGTTCCGTTGACTCCCAT         |
| <i>GmCRK2-qPCR</i>      | F: GCGGCTCAATCAACCAGTG<br>R: GTGGAGCAGTTGCGGATA          |
| <i>GmNAC90-qPCR</i>     | F: GCCATAGACAGAGTTATCCCAGTTA<br>R: CCTGTTGCTTTCCAATACCCA |
| <i>GmNAC29-qPCR</i>     | F: ACCAAGCCACATCAAGACCAT<br>R: ATACCCAGACACGGTTGCTC      |
| <i>GmERF104-qPCR</i>    | F: AGCCTCCAAGTCCTCATCA<br>R: CTATTAGGGTCACGGATTTCTGC     |
| <i>GmbHLH35-qPCR</i>    | F: AACGATAGGCTTTTGGCACTTA<br>R: CAGAATAGGGAGGTCCTGGTCA   |
| <i>GmMYB70-qPCR</i>     | F: AGGGCTCACGCCAGGTTC<br>R: CGATGGGCTGCCAGGGTT           |
| <i>GmMLP34-qPCR</i>     | F: TAAAGGTGAATGGGGCAAAGA<br>R: ATGAGCGTCAGGAATGTGGTC     |
| <i>GmBTB/POZ-qPCR</i>   | F: CTCCGACGACGCTCCCAT<br>R: GGTGCCACTCCGCCTTTC           |
| <i>GmEF1-qPCR</i>       | F: CCACTGCTGAAGAAGATGATGATG<br>R: AAGGACAGAAGACTTGCCACTC |
| <i>TEF1-qPCR</i>        | F: TGATCGTGCTGAACCACCC<br>R: CGAGCGACGGTCCATCTT          |
| <i>GmLHP1-8-qPCR</i>    | F: AAGGTTTTCTGCTCTTGGTGA<br>R: AAAAACGCCGAAGGCTGTAA      |
| <i>GmBTB/POZ-1-qPCR</i> | F: CTCCGACGACGCTCCCAT<br>R: GGTGCCACTCCGCCTTTC           |

**Primers for constructs in soybean genetic transformation**

| <b>Primer name</b> | <b>Primers (5'-3')</b>                                                                                           |
|--------------------|------------------------------------------------------------------------------------------------------------------|
| <i>GmLHP1-Flag</i> | F: ctcttgaccatggtaGATTACAAGGATGACGACGATAAGATGAAGGG<br>TGGTGGTGGG<br>R: gtcacctgtaattcacacgtgTCACAATGTAGGGCTGTAGC |
| <i>GmLHP1RNAi1</i> | F: CCGCTCGAGGATCCAAAAGGAGAAAATGTG<br>R: CATGCCATGGCAATGTAGGGCTGTAGCGAA                                           |
| <i>GmLHP1RNAi2</i> | F: GCTCTAGAGATCCAAAAGGAGAAAATGTG                                                                                 |

---

|                      |                                        |
|----------------------|----------------------------------------|
|                      | R: <u>CGGGATCCCAATGTAGGGCTGTAGCGAA</u> |
| <i>GmBTB/POZ-Myc</i> | F: <u>CCATGGTGATGCCTCCGCGGCGGTGCAC</u> |
|                      | R: <u>CACGTGAAATGCGCCTGCAGTATTTA</u>   |
| <i>GmBTB/POZRNa1</i> | F: <u>CCGCTCGAGGAGCGTGAGAGCACAG</u>    |
|                      | R: <u>CATGCCATGGCTCGTTGGCCTCCTGG</u>   |
| <i>GmBTB/POZRNa2</i> | F: <u>GCTCTAGAGAGCGTGAGAGCACAGC</u>    |
|                      | R: <u>CGGGATCCCTCGTTGGCCTCCTGGTA</u>   |

---

### Primers for constructs in transformation of soybean hairy roots

---

| Primer name                        | Primers (5'-3')                                                                                                                                    |
|------------------------------------|----------------------------------------------------------------------------------------------------------------------------------------------------|
| <i>GmLHP1-Flag</i>                 | F: <u>CTCGAGATGGATTACAAGGATGACGACGATAAGATGAAGGG</u><br>TGGTGGTGGGA<br>R: <u>CTCGAGTCACAATGTAGGGCTGTAGCGA</u>                                       |
| <i>GmLHP1RNAi1</i>                 | F: <u>CCGCTCGAGGATCCAAAAGGAGAAAATGTG</u><br>R: <u>CATGCCATGGCAATGTAGGGCTGTAGCGAA</u>                                                               |
| <i>GmLHP1RNAi2</i>                 | F: <u>GCTCTAGAGATCCAAAAGGAGAAAATGTG</u><br>R: <u>CGGGATCCCAATGTAGGGCTGTAGCGAA</u>                                                                  |
| <i>GmBTB/POZ-Myc</i>               | F: <u>CCATGGTGATGCCTCCGCGGCGGTGCAC</u><br>R: <u>CACGTGAAATGCGCCTGCAGTATTTA</u>                                                                     |
| <i>GmBTB/POZRNa1</i>               | F: <u>CCGCTCGAGGAGCGTGAGAGCACAG</u><br>R: <u>CATGCCATGGCTCGTTGGCCTCCTGG</u>                                                                        |
| <i>GmBTB/POZRNa2</i>               | F: <u>GCTCTAGAGAGCGTGAGAGCACAGC</u><br>R: <u>CGGGATCCCTCGTTGGCCTCCTGGTA</u>                                                                        |
| <i>GmLHP1-Flag+GmBTB/POZ-Myc2</i>  | F: <u>CTCGAGATGGATTACAAGGATGACGACGATAAGATGAAGGG</u><br>TGGTGGTGGGA<br>R: <u>CTCGAGTCACAATGTAGGGCTGTAGCGA</u>                                       |
| <i>GmWRKY40-Flag</i>               | F: <u>caaatctatctctctcgagATGGATTACAAGGATGACGACGATAAGATG</u><br>CTTCTCTCACTTCACAACTT<br>R: <u>attattatggagaaactcgagTTAATTATTATTGTGCAACATTTTTCCA</u> |
| <i>GmWRKY40RNAi1</i>               | F: <u>CCGCTCGAGTAACCGAAATGCTCACAGA</u><br>R: <u>CATGCCATGGGTTGGAACCTGTTGTTACCTC</u>                                                                |
| <i>GmWRKY40RNAi2</i>               | F: <u>GCTCTAGATAACCGAAATGCTCACAGA</u><br>R: <u>CGGGATCCGTTGGAACCTGTTGTTACCTC</u>                                                                   |
| <i>(domain+C)-Myc</i>              | F: <u>ctcttgaccatggtgagatctGCTTCCACCGCCGATGTC</u><br>R: <u>accgtaattaaccccactgAAATGCGCCTGCAGTATTTAATAG</u>                                         |
| <i>GmLHP1-Flag+(domain+C)-Myc2</i> | F: <u>CTCGAGATGGATTACAAGGATGACGACGATAAGATGAAGGG</u><br>TGGTGGTGGGA<br>R: <u>CTCGAGTCACAATGTAGGGCTGTAGCGA</u>                                       |
| <i>(N+domain)-Myc</i>              | F: <u>ctcttgaccatggtgagatctATGCCTCCGCGGCGGTGC</u><br>R: <u>accgtaattaaccccactgCATTTTGGCGATCAAATACTTTTC</u>                                         |
| <i>GmLHP1-Flag+(N+domain)-Myc2</i> | F: <u>CTCGAGATGGATTACAAGGATGACGACGATAAGATGAAGGG</u><br>TGGTGGTGGGA<br>R: <u>CTCGAGTCACAATGTAGGGCTGTAGCGA</u>                                       |
| <i>GmBTB/POZ-1-Myc</i>             | F: <u>ctcttgaccatggtgagatctATGCCTCCGCGGCGGTGC</u>                                                                                                  |

---

|                         |                                                                                                                                                        |
|-------------------------|--------------------------------------------------------------------------------------------------------------------------------------------------------|
| <i>GmLHP1-Flag+</i>     | R: accgtaattaaccccacgtgTGTTTCATATATTTCCACAACAAGACG<br>F: <u>CTCGAGATGGATTACAAGGATGACGACGATAAGATGAAGGG</u>                                              |
| <i>GmBTB/POZ-1-Myc2</i> | TGGTGGTGGGA                                                                                                                                            |
| <i>GmLHP1-8-Flag</i>    | R: <u>CTCGAGTCACAATGTAGGGCTGTAGCGA</u><br>F: <u>CTCGAGATGGATTACAAGGATGACGACGATAAGATGAAGGG</u><br>TGGTGGTGGGA<br>R: <u>CTCGAGTCACAATGTAGGGCTGTAGCGA</u> |

### Primers for constructs in yeast two-hybrid assays

| Primer name          | Primers (5'-3')                                                                                           |
|----------------------|-----------------------------------------------------------------------------------------------------------|
| <i>GmLHP1-BD</i>     | F: <u>GAATTCATGAAGGGTGGTGGTGGGA</u><br>R: <u>GTCGACTCACAAATGTAGGGCTGTAGCGA</u>                            |
| <i>GmLHP1-AD</i>     | F: <u>GAATTCATGAAGGGTGGTGGTGGGAA</u><br>R: <u>GAGCTCTCACAAATGTAGGGCTGTAGCGA</u>                           |
| <i>GmBTB/POZ-BD</i>  | F: atggccatggaggccgaattcAATTGGGATAAAGCTATTTCTAACTATGC<br>R: ccgctgcaggtcgacggatccAAATGCGCCTGCAGTATTTAATAG |
| <i>GmBTB/POZ-AD</i>  | F: gccatggaggccgatgaattcAATTGGGATAAAGCTATTTCTAACTATGC<br>R: cagctcgagctcgatggatccAAATGCGCCTGCAGTATTTAATAG |
| <i>GmBTB/POZN</i>    | F: atggccatggaggccgaattcATGCCTCCGCGGCGGTGC                                                                |
| <i>-BD</i>           | R: ccgctgcaggtcgacggatccGTTAAGATTGGGAGAGGGGAGAG                                                           |
| <i>GmBTB/POZ</i>     | F: atggccatggaggccgaattcGCTTCCACCGCCGATGTC                                                                |
| <i>domain -BD</i>    | R: ccgctgcaggtcgacggatccCATTTTGGCGATCAAATACTTTTC                                                          |
| <i>GmBTB/POZC</i>    | F: atggccatggaggccgaattcAATTGGGATAAAGCTATTTCTAACTATGC                                                     |
| <i>-BD</i>           | R: ccgctgcaggtcgacggatccAAATGCGCCTGCAGTATTTAATAG                                                          |
| <i>(domain+C)-BD</i> | F: atggccatggaggccgaattcATGGCTTCCACCGCCGAT<br>R: ccgctgcaggtcgacggatccCTAAAATGCGCCTGCAGTATTTAA            |
| <i>(N+domain)-BD</i> | F: atggccatggaggccgaattcATGCCTCCGCGGCGGTGC<br>R: ccgctgcaggtcgacggatccCTACATTTTGGCGATCAAATACTTTT          |

### Primers for constructs in pull-down assays

| Primer name          | Primers (5'-3')                                                                              |
|----------------------|----------------------------------------------------------------------------------------------|
| <i>GmLHP1-His</i>    | F: <u>GGAATTC</u> AATGAAGGGTGGTGGTGG<br>R: <u>GGTCGACCAATGTAGGGCTGTAGCGAA</u>                |
| <i>GmBTB/POZ-GST</i> | F: ccgctggatccccgaattcATGCCTCCGCGGCGGTGC<br>R: gtcacgatgcggccgctcgagCTAAAATGCGCCTGCAGTATTTAA |

### Primers for constructs in LCI assays

| Primer name            | Primers (5'-3')                                                                               |
|------------------------|-----------------------------------------------------------------------------------------------|
| <i>GmLHP1-nLUC</i>     | F: gagctcggtagctccggatccATGAAGGGTGGTGGTGGGA<br>R: gatctggtgactccactagtCAATGTAGGGCTGTAGCGAAGA  |
| <i>GmBTB/POZ-ccLUC</i> | F: cggggcggtacctccggatccATGCCTCCGCGGCGGTGC<br>R: ctgcaggtgactccactagtCTAAAATGCGCCTGCAGTATTTAA |

## Primers for constructs in BiFC assays

| Primer name           | Primers (5'-3')                                                             |
|-----------------------|-----------------------------------------------------------------------------|
| <i>GmBTB/POZ-NYFP</i> | F: <u>GGAATTC</u> GAGCGTGAGAGCACAGCA<br>R: <u>GGGTACCAAAATGCGCCTGCAGTAT</u> |
| <i>GmLHP1-CYFP</i>    | F: <u>GAATTC</u> ATGAAGGGTGGTGGTGGG<br>R: <u>CGACACAATGTAGGGCTGTAGCGAA</u>  |
| <i>GmBTB/POZN</i>     | F: <u>CTCGAGCATGCCTCCGCGGCGGTGC</u>                                         |
| <i>-NYFP</i>          | R: <u>GAATTC</u> GTTAAGATTGGGAGAGGGGAG                                      |
| <i>GmBTB/POZ</i>      | F: <u>CTCGAGCATGGCTTCCACCGCCGAT</u>                                         |
| <i>domain-NYFP</i>    | R: <u>GAATTC</u> ATTTTGGCGATCAAATACTTTT                                     |
| <i>GmBTB/POZC</i>     | F: <u>CTCGAGCATGAATTGGGATAAAGCTATTTCTAACT</u>                               |
| <i>-NYFP</i>          | R: <u>GAATTC</u> AAATGCGCCTGCAGTATTTAA                                      |
| <i>(domain+C)</i>     | F: <u>CTCGAGCATGGCTTCCACCGCCGAT</u>                                         |
| <i>-NYFP</i>          | R: <u>GAATTC</u> AAATGCGCCTGCAGTATTTAA                                      |
| <i>(N+domain)</i>     | F: <u>CTCGAGCATGCCTCCGCGGCGGTGC</u>                                         |
| <i>-NYFP</i>          | R: <u>GAATTC</u> ATTTTGGCGATCAAATACTTTT                                     |

## Primers for subcellular localization

| Primer name          | Primers (5'-3')                                                                                         |
|----------------------|---------------------------------------------------------------------------------------------------------|
| <i>GmLHP1-1302</i>   | F: catctagtcacatgccatggca ATGAAGGGTGGTGGTGGGA<br>R: cgacctcgaggaagatct AATGTAGGGCTGTAGCGAAGATGC         |
| <i>GmLHP1-1-1302</i> | F: actcttgaccatggtagatctgGAAAATTTCTTTGAAGTTGAAGCCA<br>R: aagttctctcctttactagtCAATGTAGGGCTGTAGCGAAGA     |
| <i>GmLHP1-2-1302</i> | F: actcttgaccatggtagatctgATGAAGGGTGGTGGTGGGA<br>R: aagttctctcctttactagtACCACTACCAGCATCTCTTGTTCG         |
| <i>GmLHP1-3-1302</i> | F: actcttgaccatggtagatctgAAGAAAGAAGCTATATGCTAATGAGCCTG<br>R: aagttctctcctttactagtCAATGTAGGGCTGTAGCGAAGA |
| <i>GmLHP1-4-1302</i> | F: actcttgaccatggtagatctgATGAAGGGTGGTGGTGGGA<br>R: aagttctctcctttactagtGTCACCTTCACTTGTTCATGCA           |
| <i>GmLHP1-5-1302</i> | F: actcttgaccatggtagatctgACAACCTTACAGCCTTCGGC<br>R: aagttctctcctttactagtCAATGTAGGGCTGTAGCGAAGA          |
| <i>GmLHP1-6-1302</i> | F: actcttgaccatggtagatctgAAACGCAAGCATGTAGTGCATC<br>R: aagttctctcctttactagtCAATGTAGGGCTGTAGCGAAGA        |
| <i>GmLHP1-7-1302</i> | F: actcttgaccatggtagatctgATGAAGGGTGGTGGTGGGA<br>R: aagttctctcctttactagtCTCCTCAAAAGCTTCAACAACATC         |
| <i>GmLHP1-8-1302</i> | F: actcttgaccatggtagatctgATGAAGGGTGGTGGTGGGA<br>R: aagttctctcctttactagtCAATGTAGGGCTGTAGCGAAGA           |
| <i>GmBTB/POZ</i>     | F: <u>CCATGGTTATGCCTCCGCGGCGGTGC</u>                                                                    |
| <i>-1302</i>         | R: <u>ACTAGTAAATGCGCCTGCAGTATTTAAT</u>                                                                  |
| <i>GmBTB/POZ</i>     | F: actcttgaccatggtagatctgATGCCTCCGCGGCGGTGC                                                             |
| <i>-1-1302</i>       | R: aagttctctcctttactagtTGTTTCATATATTTCCACAACAAGACG                                                      |
| <i>GmBTB/POZ</i>     | F: actcttgaccatggtagatctgATGCCTCCGCGGCGGTGC                                                             |
| <i>-2-1302</i>       | R: aagttctctcctttactagtATAGTTAGAAATAGCTTTATCCCAATTCA                                                    |
| <i>GmBTB/POZ</i>     | F: actcttgaccatggtagatctgATGCCTCCGCGGCGGTGC                                                             |



---

|                  |                                                        |
|------------------|--------------------------------------------------------|
| -3-1302          | R: aagttcttcctttactagtCATTTTGGCGATCAAATACTTTTC         |
| <i>GmBTB/POZ</i> | F: actcttgaccatggtagatctgATGCCTCCGCGGGCGGTGC           |
| -4-1302          | R: aagttcttcctttactagtATTATCAAGGGACGCTTCAGCA           |
| <i>GmBTB/POZ</i> | F: actcttgaccatggtagatctgGCTTCCACCGCCGATGTC            |
| -5-1302          | R: aagttcttcctttactagtAAATGCGCCTGCAGTATTTAATAG         |
| <i>GmBTB/POZ</i> | F: actcttgaccatggtagatctgGCCGATGTCGTCTCGTTC            |
| -6-1302          | R: aagttcttcctttactagtAAATGCGCCTGCAGTATTTAATAG         |
| <i>GmBTB/POZ</i> | F: actcttgaccatggtagatctgAATTGGGATAAAGCTATTTCTAACTATGC |
| -7-1302          | R: aagttcttcctttactagtAAATGCGCCTGCAGTATTTAATAG         |

---

### Primers for transient expression assay

---

| Primer name      | Primers (5'-3')                                                  |
|------------------|------------------------------------------------------------------|
| <i>GmLHP1-BD</i> | F: GAATTCATGAAGGGTGGTGGTGGGA<br>R: GTCGACTCACAAATGTAGGGCTGTAGCGA |

---

### Primers for ChIP assays

---

| Primer name       | Primers (5'-3')                                      |
|-------------------|------------------------------------------------------|
| <i>GmWRKY40-a</i> | F: ATGATTGCCTGCCCTCG<br>R: CCATCAAGTCGGGATAGAAGT     |
| <i>GmWRKY40-b</i> | F: AGACAGACTTCTATCCCGACTT<br>R: TTTTCTTGGGGATTAGGTTT |
| <i>GmWRKY40-c</i> | F: CAGAAAACCTAATCCCCAAG<br>R: GCTGGAAAAGGAAGGGAAT    |
| <i>GmWRKY40-d</i> | F: TTCCCTTCTTTTCCAGC<br>R: TGAGTAACACGGAAGTAGATGC    |
| <i>GmEF1-a</i>    | F: AGAGAGACTTATGGCAAAGACAA<br>R: CTCCTTCTTCTCCCCGC   |
| <i>GmEF1-b</i>    | F: GATGCGGGGAGAAGAAGG<br>R: TCACTTTTGGTTCCTTTATCTT   |
| <i>GmEF1-c</i>    | F: TCGGGTCAGATGTCGGATG<br>R: TACAGTGCGAGCGAGCGT      |

---

### Primers for transient transcription dual-luciferase assay

---

| Primer name         | Primers (5'-3')                                                       |
|---------------------|-----------------------------------------------------------------------|
| <i>GmWRKY40-LUC</i> | F: GGAAGCTTAATTTCTTGCAGACCAACTGAC<br>R: GGGATCCCAAAGCTGGCATTCTTTATTTT |

---

### Primers for Promoter-GUS analysis

---

| <b>Primer name</b>  | <b>Primers (5'-3')</b>                                               |
|---------------------|----------------------------------------------------------------------|
| <i>GmWRKY40-GUS</i> | F: GGAAGCTTAATTTCTTGCAGACCAACTGAC<br>R: GGGATCCCAAAGCTGGCATTCTTTATTT |

---
