# Supplementary material for: GmBTB/POZ promotes the ubiquitination and degradation of LHP1 to regulate the response of soybean to Phytophthora sojae
Source: PubMed Central journal article supplement (PMC7979691; doi:10.1038/s42003-021-01907-7), 2021-03-19
Supplement: 42003_2021_1907_MOESM3_ESM.pdf [file 42003_2021_1907_MOESM3_ESM.pdf]

## **Description of Additional Supplementary Files**

**File Name:** Supplementary Data 1

**Description:** Source data underlying the graphs presented in the main figures and supplementary figures.

**File Name:** Supplementary Data 2

**Description:** All RNA-Seq analysis data on GmLHP1OE vs. wild-type soybean plants.
